# Supplementary material
Source: publisher site journal article supplement (https://www.dovepress.com/article/385555)
Supplement: Supplementary file 1 [file get_supplementary_file.php]

**Supplementary File S1.**

**1- Presentation of the AP-HP Clinical Data Warehouse**

Since 2010, the AP-HP has been deploying a common Electronic Healthcare Record, based on the Orbis Clinical Information System (AGFA Healthcare). Since 2014, an analytics platform has been developed, based on a CDW aggregating day-to-day inpatients data (administrative, socio-demographic, biological, microbiological, radiological, physiological, patient pathway, ICD-10, procedures). Out-of-hospital mortality data is made available through linkage with the French national death register (INSEE, French National Institute of Statistics and Economic Studies). The AP-HP CDW was authorized by the French Data Protection Authority (Commission Nationale de l’Informatique et des Libertés, number 1980120).

**2- Quality check**

We cross-checked our primary selection with a second selection based on ICD-10 codes of bacteremia. For each hospital and year, we calculated the number of stays with an ICD-10 code of bacteremia but without a corresponding positive blood culture in the microbiology log. If in any year, this number was greater than one quarter the number of stays identified in the primary selection, the hospital was excluded.

**Supplementary Table S1. ICD-10 codes used for selection and classification of bacterial infections in the Bacthub database, adapted from Opatowski et al [1]**

| Primary infection site | ICD-10 codes |
| --- | --- |
| Cardio-vascular | A39.5, I30.1, I30.9, I32.0, I33, I40.0, I41.0, I70.01, I70.21, I70.81, I70.91, I98.0, J98.5 |
| Congenital or Perinatal | A50, O23, O41.1, O85, O86, O88.3, O91, O98.1, O98.2, O98.8, O98.9, P00.2, P23.1, P23.2, P23.3, P23.4, P23.5, P23.6, P23.8, P36, P37.2, P37.8, P39.0, P39.2, P39.8, P39.9, P78.1 |
| Device-related | T85.7, T84.5, T84.6, T84.7, T82.6, T82.7, T83.5 |
| Digestive tract | A00, A01, A02, A03, A04, A05, A22.2, A39.1, A42.1, D73.3, K29.1, K29.5, K29.6, K29.7, K29.8, K29.9,  K35, K36, K37, K40.1, K40.4, K41.1, K41.4, K42.1, K43.1, K43.4, K43.7, K44.1, K45.1, K57.0, K57.2, K57.4, K57.8, K61, K63.0, K65, K67, K75.0, K80.0, K80.1, K80.3, K80.4, K81, K83.0, K83.8 |
| Eye, ear, nose and throat | A36.0, A36.1, A36.2, A42.2, A74.0, H04.3, H04.4, H10.0, H10.3, H10.4, H10.5, H13.1, H15, H15.0, H15.1, H16,  H16.0-H16.9, H30, H30.0-H30.9, H44.0, H60, H62.0, H66, H67, H67.0, H68.0, H70, H71, H73, H75, J01-J06, J32, J34.0, J35.0, J36, J37, J39.0, J39.1, K04.4, K04.5, K04.6, K04.7, K05.0, K05.1, K05.2, K05.3, K10.2, K10.3, K11.3, K12.2 |
| Genital | N45.0, N45.9, N49, N51, N70, N73, N75, N76, N77 |
| Joint & Bone | M00, M01.0, M01.2, M01.3, M46.2- M46.5, M49.1-M49.3, M86, Z76.800 |
| Lower respiratory tract | A22.1, A31.0, A37, A42.0, A43.0, A70, J13-J15, J16, J17.0, J17.8, J18, J20, J20.0-J20.2, J20.8, J20.9, J22, J40, J41, J42, J85, J86, J90 |
| Muscle | M60.0 |
| Nervous system | A32.1, A39.0, G00, G01, G03.9, G04.2, G05.0, G06, G07 |
| Others | A22.8, A22.9, A23, A24, A25, A26.8, A26.9, A27, A28, A30, A31.8, A31.9, A32.8, A32.9, A33, A34, A35, A36.8, A36.9, A39.8, A39.9, A42.8, A42.9, A43.8, A43.9, A44.0, A44.8, A44.9, A48, A49, A65, A66, A67, A68, A691, A69.2, A69.8, A69.9, A74.8, A74.9, A75, A77, A78, A79, L04, R02, T814 |
| Sexually-transmitted | A51, A52, A53, A54, A55, A56, A57, A58, A71 |
| Skin & soft tissues | A20, A21, A22.0, A26.0, A31.1, A32.0, A36.3, A38, A43.1, A44.1, A46, A69.0, L00-L03.9, L05.0, L08, L30.3, L73.2, L88, L89-L89.9, L97, M65.0, M71.0, M71.1, M72.6, N61, T31, T79.3, T80.2, T87.4, T88.0 |
| Urinary tract | N08.0, N10, N11.0, N11.1, N12, N13.6, N15.1, N16.0, N29.0, N29.1, N30.0, N30.2, N30.3, N30.8, N30.9, N34, N34.0-N34.2, N39.0, N41.0-N41.3 |

**References:**

1. Opatowski, M.; Tuppin, P.; Cosker, K.; Touat, M.; De Lagasnerie, G.; Guillemot, D.; Salomon, J.; Brun-Buisson, C.; Watier, L. Hospitalisations with Infections Related to Antimicrobial-Resistant Bacteria from the French Nationwide Hospital Discharge Database, 2016. *Epidemiol. Infect.* **2019**, *147*, e144, doi:10.1017/S0950268819000402.

**Supplementary Table S2. List of acute care or mixed AP-HP hospitalsa**

| **Hospital name** | **Type of activity** | **Included** | **No. of beds** |
| --- | --- | --- | --- |
| Ambroise-Paré | Ab | Yes | 497 |
| Antoine-Béclère | A | Nod | 411 |
| Armand-Trousseau | A | Noe | ~70 (adults) |
| Avicenne | A | Yes | 543 |
| Beaujon | A | Yes | 394 |
| Bicêtre | Bc | Yes | 1,027 |
| Bichat-Claude Bernard | B | Yes | 916 |
| Cochin | A | Yes | 1,074 |
| Georges Pompidou | A | Nof | 827 |
| Henri-Mondor | A | Nof | 843 |
| Hôtel-Dieu | A | Nof | 44 |
| Jean-Verdier | A | Yes | 300 |
| Lariboisière and Fernand-Widal | B | Yes | 976 |
| Louis-Mourier | B | Nod | 494 |
| Necker-Enfants Malades | A | Noe | ~200 (adults) |
| Paul-Brousse | B | Yes | 771 |
| Pitié-Salpêtrière | B | Yes | 1,717 |
| Raymond-Poincaré | B | Nod | 362 |
| Robert-Debré | A | Noe | ~60 (adults) |
| Saint-Antoine | A | Yes | 679 |
| Saint-Louis | A | Yes | 700 |
| Tenon | A | Yes | 559 |

AP-HP: Assistance Publique Hôpitaux de Paris. a Sixteen of the 39 AP-HP Hospitals with an exclusive long-term care & rehabilitation activity were excluded (Albert-Chenevier, Berck, Bretonneau, Broca – La collégiale, Charles-Foix, Corentin-Celton, Dupuytren, Emile-Roux, Georges-Clemenceau, Hendaye, La Roche-Guyon, Paul-Doumer, René-Muret, Rothschild, Sainte-Périne, San Salvadour, Vaugirard); b A: acute care; c B: Both acute care and long-term care & rehabilitation; d exclusion because of unstable reporting of microbiological data; e exclusion because of pediatric hospital; f exclusion because of few microbiological data.

**Supplementary Table S3. Characteristics of patients by year, 2016-2019**

**A. Patients with a CO episode**

|  | 2016 | 2017 | 2018 | 2019 |
| --- | --- | --- | --- | --- |
| Number of patients | 2,944 | 3,005 | 3,056 | 3,107 |
| Men | 1,672 (56.79) | 1,625 (54.08) | 1,676 (54.84) | 1,705 (54.88) |
| Age, years | 67 [54 - 79] | 68 [55 - 80] | 68 [54 - 80] | 68 [55 - 80] |
| 18-35 | 206 (7) | 229 (7.62) | 248 (8.12) | 270 (8.69) |
| 35-50 | 392 (13.32) | 366 (12.18) | 370 (12.11) | 368 (11.84) |
| 50-65 | 758 (25.75) | 746 (24.83) | 740 (24.21) | 758 (24.4) |
| 65-80 | 915 (31.08) | 930 (30.95) | 981 (32.1) | 997 (32.09) |
| >80 | 673 (22.86) | 734 (24.43) | 717 (23.46) | 714 (22.98) |
| Charlson score a | 2 [0 - 3] | 2 [0 - 3] | 2 [0 - 3] | 2 [0 - 3] |
| 0 | 742 (38.83) | 1,049 (37.86) | 1,193 (39.98) | 1,175 (39.67) |
| 1-2 | 595 (31.14) | 933 (33.67) | 935 (31.33) | 955 (32.24) |
| 3-4 | 247 (12.93) | 337 (12.16) | 400 (13.4) | 347 (11.72) |
| 5-6 | 102 (5.34) | 141 (5.09) | 150 (5.03) | 127 (4.29) |
| 7-8 | 154 (8.06) | 230 (8.3) | 224 (7.51) | 262 (8.85) |
| >8 | 71 (3.72) | 81 (2.92) | 82 (2.75) | 96 (3.24) |
| Comorbidity a |  |  |  |  |
| Any malignancy b | 477 (24.96) | 714 (25.77) | 745 (24.97) | 773 (26.1) |
| Metastatic solid tumor | 199 (10.41) | 268 (9.67) | 272 (9.12) | 315 (10.63) |
| Congestive heart failure | 290 (15.18) | 427 (15.41) | 435 (14.58) | 420 (14.18) |
| Diabetes  Uncomplicated  Chronic complication | 393 (20.57)  253 (13.24)  140 (7.33) | 571 (20.61)  346 (12.49)  225 (8.12) | 593 (19.87)  378 (12.67)  215 (7.21) | 545 (18.4)  338 (11.41)  207 (6.99) |
| Vascular disease  Coronary  Peripheral  Cerebrovascular | 248 (12.98)  32 (1.67)  120 (6.28)  113 (5.91) | 333 (12.02)  49 (1.77)  154 (5.56)  151 (5.45) | 348 (11.66)  41 (1.37)  180 (6.03)  167 (5.6) | 332 (11.21)  63 (2.13)  143 (4.83)  150 (5.06) |
| Renal disease | 270 (14.13) | 361 (13.03) | 366 (12.27) | 340 (11.48) |
| Liver disease  Mild  Moderate or severe | 174 (9.11)  113 (5.91)  61 (3.19) | 265 (9.56)  182 (6.57)  83 (3) | 292 (9.79)  191 (6.4)  101 (3.38) | 273 (9.22)  173 (5.84)  100 (3.38) |
| Chronic pulmonary disease | 154 (8.06) | 189 (6.82) | 193 (6.47) | 180 (6.08) |
| Dementia | 101 (5.29) | 136 (4.91) | 163 (5.46) | 132 (4.46) |
| Hemiplegia or paraplegia | 53 (2.77) | 76 (2.74) | 81 (2.71) | 86 (2.9) |
| Rheumatologic disease | 25 (1.31) | 42 (1.52) | 42 (1.41) | 45 (1.52) |
| Mortality |  |  |  |  |
| In-hospital  ICU admission  No ICU admission | 424 (14.4)  273 / 963 (28.35)  151 / 1,981 (7.62) | 426 (14.18)  267 / 938 (28.46)  159 / 2,067 (7.69) | 376 (12.3)  228 / 926 (24.62)  148 / 2,130 (6.95) | 410 (13.2)  225 / 931 (24.17)  185 / 2,176 (8.50) |
| 30-day  ICU admission  No ICU admission | 451 (15.32)  262 / 963 (27.21)  189 / 1,981 (9.54) | 461 (15.34)  254 / 938 (27.08)  207 /2,067 (10.01) | 414 (13.55)  226 / 926 (24.41)  188 / 2,130 (8.83) | 439 (14.13)  209 / 931 (22.45)  230 /2,176 (10.57) |
| 90-day  ICU admission  No ICU admission | 588 (19.97)  313 / 963 (32.50)  275 / 1,981 (13.88) | 627 (20.87)  307 / 938 (32.73)  320 / 2,067 (15.48) | 574 (18.78)  282 / 926 (30.45)  292 / 2,130 (13.71) | 587 (18.89)  252 / 931 (27.07)  335 / 2,176 (15.40) |

**B. Patients with a HA episode**

|  | 2016 | 2017 | 2018 | 2019 |
| --- | --- | --- | --- | --- |
| Number of patients | 4,271 | 4,220 | 4,265 | 4,360 |
| Men | 2,648 (62) | 2,619 (62.06) | 2,618 (61.38) | 2,691 (61.72) |
| Age, years | 64 [52 - 74] | 64 [51 - 74] | 64 [52 - 74] | 64 [52 - 74] |
| 18-35 | 343 (8.03) | 401 (9.5) | 366 (8.58) | 363 (8.33) |
| 35-50 | 641 (15.01) | 602 (14.27) | 594 (13.93) | 616 (14.13) |
| 50-65 | 1,357 (31.77) | 1,324 (31.37) | 1,308 (30.67) | 1,323 (30.34) |
| 65-80 | 1,376 (32.22) | 1,358 (32.18) | 1,416 (33.2) | 1,457 (33.42) |
| >80 | 554 (12.97) | 535 (12.68) | 581 (13.62) | 601 (13.78) |
| Charlson score a | 2 [1 - 5] | 2 [1 - 6] | 2 [1 - 4] | 2 [1 - 4] |
| 0 | 466 (19.42) | 871 (22.77) | 942 (22.2) | 982 (23.19) |
| 1-2 | 847 (35.31) | 1,271 (33.22) | 1,565 (36.88) | 1,525 (36.02) |
| 3-4 | 422 (17.59) | 612 (16) | 685 (16.14) | 685 (16.18) |
| 5-6 | 176 (7.34) | 280 (7.32) | 283 (6.67) | 320 (7.56) |
| 7-8 | 340 (14.17) | 566 (14.79) | 539 (12.7) | 503 (11.88) |
| >8 | 148 (6.17) | 226 (5.91) | 229 (5.4) | 219 (5.17) |
| Comorbidity a |  |  |  |  |
| Any malignancy b | 1,060 (44.19) | 1,640 (42.86) | 1,783 (42.02) | 1,781 (42.06) |
| Metastatic solid tumor | 405 (16.88) | 667 (17.43) | 654 (15.41) | 637 (15.04) |
| Congestive heart failure | 466 (19.42) | 701 (18.32) | 871 (20.53) | 777 (18.35) |
| Diabetes  Uncomplicated  Chronic complication | 519 (21.63)  312 (13.01)  207 (8.63) | 731 (19.11)  446 (11.66)  285 (7.45) | 866 (20.41)  530 (12.49)  336 (7.92) | 824 (19.46)  476 (11.24)  348 (8.22) |
| Vascular disease  Coronary  Peripheral  Cerebrovascular | 430 (17.92)  62 (2.58)  218 (9.09)  194 (8.09) | 718 (18.77)  123 (3.21)  347 (9.07)  353 (9.23) | 794 (18.71)  167 (3.94)  352 (8.3)  387 (9.12) | 774 (18.28)  144 (3.4)  320 (7.56)  413 (9.75) |
| Renal disease | 416 (17.34) | 562 (14.69) | 591 (13.93) | 583 (13.77) |
| Liver disease  Mild  Moderate or severe | 310 (12.92)  161 (6.71)  149 (6.21) | 493 (12.89)  258 (6.74)  235 (6.14) | 482 (11.36)  267 (6.29)  215 (5.07) | 472 (11.15)  259 (6.12)  213 (5.03) |
| Chronic pulmonary disease | 215 (8.96) | 296 (7.74) | 350 (8.25) | 316 (7.46) |
| Dementia | 124 (5.17) | 127 (3.32) | 141 (3.32) | 170 (4.02) |
| Hemiplegia or paraplegia | 138 (5.75) | 253 (6.61) | 260 (6.13) | 290 (6.85) |
| Rheumatologic disease | 34 (1.42) | 60 (1.57) | 78 (1.84) | 68 (1.61) |
| Mortality |  |  |  |  |
| In-hospital  ICU admission  No ICU admission | 885 (20.72)  564 / 1,888 (29.87)  321 / 2,383 (13.47) | 805 (19.08)  488 / 1,860 (26.24)  317 / 2,360 (13.43) | 833 (19.53)  543 / 1,912 (28.40)  290 / 2,353 (12.32) | 779 (17.87)  515 / 1,955 (26.34)  264 / 2,405 (10.98) |
| 30-day  ICU admission  No ICU admission | 786 (18.4)  475 / 1,888 (25.16)  311 / 2,383 (13.05) | 745 (17.65)  414 / 1,860 (22.26)  331 / 2,360 (14.03) | 769 (18.03)  463 / 1,912 (24.22)  306 / 2,353 (13.00) | 728 (16.7)  436 / 1,955 (22.30)  292 / 2,405 (12.14) |
| 90-day  ICU admission  No ICU admission | 1,136 (26.6)  635 / 1,888 (33.63)  501 / 2,383 (21.02) | 1,101 (26.09)  569 / 1,860 (30.59)  532 / 2,360 (22.54) | 1,125 (26.38)  622 / 1,912 (32.53)  503 / 2,353 (21.38) | 1,089 (24.98)  585 / 1,955 (29.92)  504 / 2,405 (20.96) |

Data are expressed as the median [first quartile, third quartile] for continuous variables, and as counts (%) for categorical variables. CO: community-onset; HA: hospital-acquired; ICU: intensive care unit. a Data available for 10,628 and 14,702 episodes of CO and HA bacteremia, respectively. b Including leukemia and lymphoma

**Supplementary Table S4. Mortality rates (in percent) per bacterial species and by type of bacteremia in the Bacthub database, 2016-2019**

|  | CO | | | HA | | |
| --- | --- | --- | --- | --- | --- | --- |
|  | In-hospital | 30-day | 90-day | In-hospital | 30-day | 90-day |
| *E. coli* | 11.0 | 12.3 | 17.3 | 17.0 | 17.1 | 24.7 |
| *S. aureus* | 18.8 | 19.2 | 24.6 | 20.1 | 18.5 | 26.6 |
| *K. pneumoniae* | 14.9 | 16.5 | 20.7 | 19.8 | 18.1 | 26.8 |
| *S. pneumoniae* | 13.0 | 13.0 | 16.3 |  |  |  |
| *S. epidermidis* | 14.1 | 12.4 | 24.9 | 19.0 | 14.0 | 25.4 |
| *P. aeruginosa* | 24.6 | 24.4 | 32.5 | 23.8 | 21.5 | 31.3 |
| *E. faecalis* | 14.1 | 16.3 | 22.5 | 21.4 | 18.6 | 28.3 |
| *P. mirabilis* | 17.3 | 20.9 | 26.2 |  |  |  |
| *S. agalactiae* | 9.3 | 12.1 | 16.3 |  |  |  |
| *S. pyogenes* | 9.9 | 10.4 | 13.5 |  |  |  |
| *E. cloacae* | - |  |  | 17.6 | 16.0 | 24.8 |
| *E. faecium* | - |  |  | 39.7 | 34.1 | 45.8 |
| *B. fragilis* | - |  |  | 13.6 | 13.3 | 17.9 |
| *S. haemolyticus* | - |  |  | 24.4 | 14.1 | 27.2 |

*B. fragilis:* *Bacteroides fragilis;* CO: community-onset; *E. cloacae: Enterobacter cloacae; E. faecalis: Enterococcus faecalis; E. faecium: Enterococcus faecium; E. coli:* *Escherichia coli;* HA: hospital-acquired; *K. oxytoca: Klebsiella oxytoca; K. pneumoniae: Klebsiella pneumoniae; P. mirabilis: Proteus mirabilis; P. aeruginosa: Pseudomonas aeruginosa; S. aureus:* *Staphylococcus aureus; S. epidermidis: Staphylococcus epidermidis; S. haemolyticus: Staphylococcus haemolyticus; S. agalactiae: Streptococcus agalactiae* (group B)*; S. dysgalactiae: Streptococcus dysgalactiae; S. pneumoniae: Streptococcus pneumoniae; S. pyogenes: Streptococcus pyogenes* (group A). Mortality rates are reported for the 10 most identified species of each category.

**Supplementary Table S5. Rates of resistance to antibiotics (in percent) in CO and in HA bacteremia, overall and per year, 2016-2019**

|  | All years | 2016 | 2017 | 2018 | 2019 | Trend |
| --- | --- | --- | --- | --- | --- | --- |
| ***E. coli*** | N = 6,983 | N = 1,711 | N = 1,762 | N = 1,766 | N = 1,744 |  |
| Aminopenicillins | 64.9 | 66.0 | 67.0 | 62.3 | 64.5 |  |
| 3GC | 15.0 | 17.0 | 14.7 | 14.6 | 13.6 | < |
| Carbapenems | 0.3 | 0.0 | 0.2 | 0.3 | 0.5 | > |
| Fluoroquinolones | 22.4 | 27.3 | 20.7 | 20.8 | 21.0 | < |
| Aminoglycosides | 11.6 | 13.8 | 11.6 | 10.5 | 10.5 | < |
| ***S. aureus*** | N = 4,185 | N = 1,022 | N = 1,045 | N = 1,063 | N = 1,055 |  |
| Methicillin | 13.0 | 14.0 | 13.7 | 11.9 | 12.3 |  |
| Rifampicin | 1.6 | 1.4 | 1.8 | 1.2 | 1.8 |  |
| Fluoroquinolones | 11.4 | 12.6 | 11.7 | 9.4 | 12.2 |  |
| ***K. pneumoniae*** | N = 2,254 | N = 556 | N = 531 | N = 575 | N = 592 |  |
| 3GC | 31.7 | 31.6 | 28.2 | 33.4 | 33.3 |  |
| Carbapenems | 1.4 | 2.0 | 1.1 | 1.4 | 1.0 |  |
| Fluoroquinolones | 29.3 | 30.7 | 27.1 | 30.4 | 28.9 |  |
| Aminoglycosides | 23.2 | 24.9 | 21.7 | 25.1 | 21.0 |  |
| ***S. epidermidis*** | N = 1,757 | N = 430 | N = 464 | N = 456 | N = 407 |  |
| Methicillin | 81.5 | 81.6 | 79.7 | 83.6 | 81.1 |  |
| Rifampicin | 14.0 | 9.5 | 12.2 | 18.4 | 16.0 | > |
| Fluoroquinolones | 67.5 | 70.7 | 65.4 | 68.1 | 65.8 |  |
| ***P. aeruginosa*** | N = 1,772 | N = 503 | N = 426 | N = 395 | N = 448 |  |
| Pip-tazobactam | 15.4 | 17.4 | 13.0 | 17.7 | 12.6 |  |
| Ceftazidime | 10.5 | 11.0 | 9.7 | 11.7 | 9.5 |  |
| Carbapenems | 19.9 | 22.6 | 18.4 | 18.3 | 19.6 |  |
| Fluoroquinolones | 12.1 | 16.4 | 11.6 | 11.5 | 8.1 | < |
| Aminoglycosides a | 6.5 | 9.2 | 5.2 | 7.6 | 3.6 | < |
| Multi-drug resistance c | 9.0 | 11.7 | 8.7 | 9.9 | 5.4 | < |
| ***S. pneumoniae*** | N = 639 | N = 159 | N = 137 | N = 169 | N = 174 |  |
| Penicillin non-wild-type b | 21.1 | 20.0 | 13.3 | 24.1 | 25.6 |  |
| Macrolides | 22.0 | 22.2 | 20.2 | 22.8 | 22.5 |  |
| Fluoroquinolones | 8.4 | 22.7 | 8.4 | 1.9 | 3.1 | < |
| 3GC | 2.1 | 2.2 | 0.9 | 1.5 | 3.7 |  |
| ***E. faecalis*** | N = 1,517 | N = 365 | N = 384 | N = 375 | N = 393 |  |
| Gentamicin HLR | 9.3 | 11.5 | 8.8 | 8.9 | 8.0 |  |
| Vancomycin | 0.3 | 0.8 | 0.0 | 0.6 | 0.0 |  |

3GC: Third generation cephalosporins; CO: community-onset; HA: hospital-acquired; HLR: high-level resistance MRSA: methicillin-resistant *S. aureus*; pip-tazobactam: piperacillin + tazobactam. The statistical significance of trends was assessed by a χ2 test for trend, and a p-value of <0.05 was considered significant. Only statistically significant results are described. For all antibiotics tested, except gentamicin in enterococci, strains rendered ‘susceptible, increased exposure’ (I) were considered resistant.a Tobramycin resistance. b Priority was given to penicillin susceptibility test results over oxacillin results. The term penicillin non-wild-type refers to *S. pneumoniae* isolates reported by local laboratories as ‘susceptible, increased exposure’ (I) or resistant (R) to penicillin. c Combined resistance to ≥3 antimicrobial groups among piperacillin+tazobactam, ceftazidime, carbapenems, fluoroquinolones and aminoglycosides, according to the definition of the ECDC.
